# Supplementary material
Source: MDPI journal article supplement (https://www.mdpi.com/2075-163X/11/2/121)
Supplement: s1 [file s1]

Archive with 2 entries (2 files):
- minerals-1089263- XML supplementary.pdf
- minerals-1089263- XML supplementary.docx
